# Supplementary material
Source: PubMed Central journal article supplement (PMC2265190)

***TRAF3<sup>+/+</sup>***

**hIL1 $\beta$**

**mTNF $\alpha$**

**M 10 30 60 10 30 60**

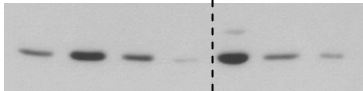

***TRAF3<sup>-/-</sup>***

**hIL1 $\beta$**

**mTNF $\alpha$**

**M 10 30 60 10 30 60**

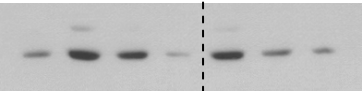

**:mins**

**p-ERK**

**ERK**

Supplement: pnas_0707959105_1.pdf [file pnas_0707959105_1.pdf]
